# Supplementary material for: Inhibition of PRMT5/MEP50 Arginine Methyltransferase Activity Causes Cancer Vulnerability in NDRG2low Adult T-Cell Leukemia/Lymphoma
Source: MDPI journal article supplement (doi:10.3390/ijms25052842), 2024-02-29
Supplement: s1 [file s1]

**Supplementary Table S1. The list of the antibodies used in this manuscript.**

| Antibody                             | Manufacturer   | Catalog no  | Type              | Dilution |
|--------------------------------------|----------------|-------------|-------------------|----------|
| AKT                                  | Cell Signaling | #9272       | Rabbit polyclonal | 1/1000   |
| MEP50                                | Cell Signaling | #2823       | Rabbit polyclonal | 1/1000   |
| H3R8me2s                             | abcam          | ab130740    | Rabbit polyclonal | 1/1000   |
| H4R3me2s                             | abcam          | ab5823      | Rabbit polyclonal | 1/1000   |
| HSP90 $\alpha$ /β(F-8)               | SANTA CRUZ     | sc-13119    | Mouse monoclonal  | 1/1000   |
| NDRG2(E-20)                          | SANTA CRUZ     | sc-19468    | Goat polyclonal   | 1/1000   |
| PRMT5(A-11)                          | SANTA CRUZ     | sc-376937   | Mouse monoclonal  | 1/1000   |
| NEMO(F-10)                           | SANTA CRUZ     | sc-166398   | Mouse monoclonal  | 1/1000   |
| GFP(B-2)                             | SANTA CRUZ     | sc-9996     | Mouse monoclonal  | 1/1000   |
| SYM10                                | Millipore      | 07-412      | Rabbit antiserum  | 1/1000   |
| β-actin(AC-74)                       | Sigma-Aldrich  | A5316       | Mouse monoclonal  | 1/1000   |
| Flag(M2)                             | Sigma-Aldrich  | F3165       | Mouse monoclonal  | 1/1000   |
| HA(3F10)                             | Roche          | 11867423001 | Rat monoclonal    | 1/1000   |
| Polyclonal Rabbit anti-Mouse IgG/HRP | Dako           | P0260       |                   | 1/1000   |
| Polyclonal Swine anti-Rabbit IgG/HRP | Dako           | P0399       |                   | 1/1000   |
| Polyclonal Rabbit anti-Rat IgG/HRP   | Dako           | P0450       |                   | 1/1000   |
| Polyclonal Rabbit anti-Goat IgG/HRP  | Dako           | P0449       |                   | 1/1000   |

Antibodies were from Cell Signaling Technologies (Beverly, MA, USA), abcam (Boston, MA, USA), Santa Cruz Biotechnology (Santa Cruz, CA, USA), Millipore (Bedford, MA, USA), Sigma-Aldrich (St. Louis, MO, USA), Roche (Basel, Switzerland), and DAKO (Carpinteria, CA, USA).

**Supplementary Table S2. The primer sequences to construct expression vectors with shRNA sequences.**

| Name      |           | Sequence (5' to 3')   |
|-----------|-----------|-----------------------|
| shMEP50-1 | sense     | CTGTCAGTGGTAGCAAAGA   |
|           | antisense | TCTTTGCTACCACTGACAG   |
| shMEP50-2 | sense     | CACCAAGAGTACAAGCTGT   |
|           | anti-ense | ACAGCTTGTA CTCTTG GTG |
| shPRMT5   | sense     | CCGAAATAGCTGACACACT   |
| (mouse)   | antisense | AGTGTGTCAGCTATTTCCG   |

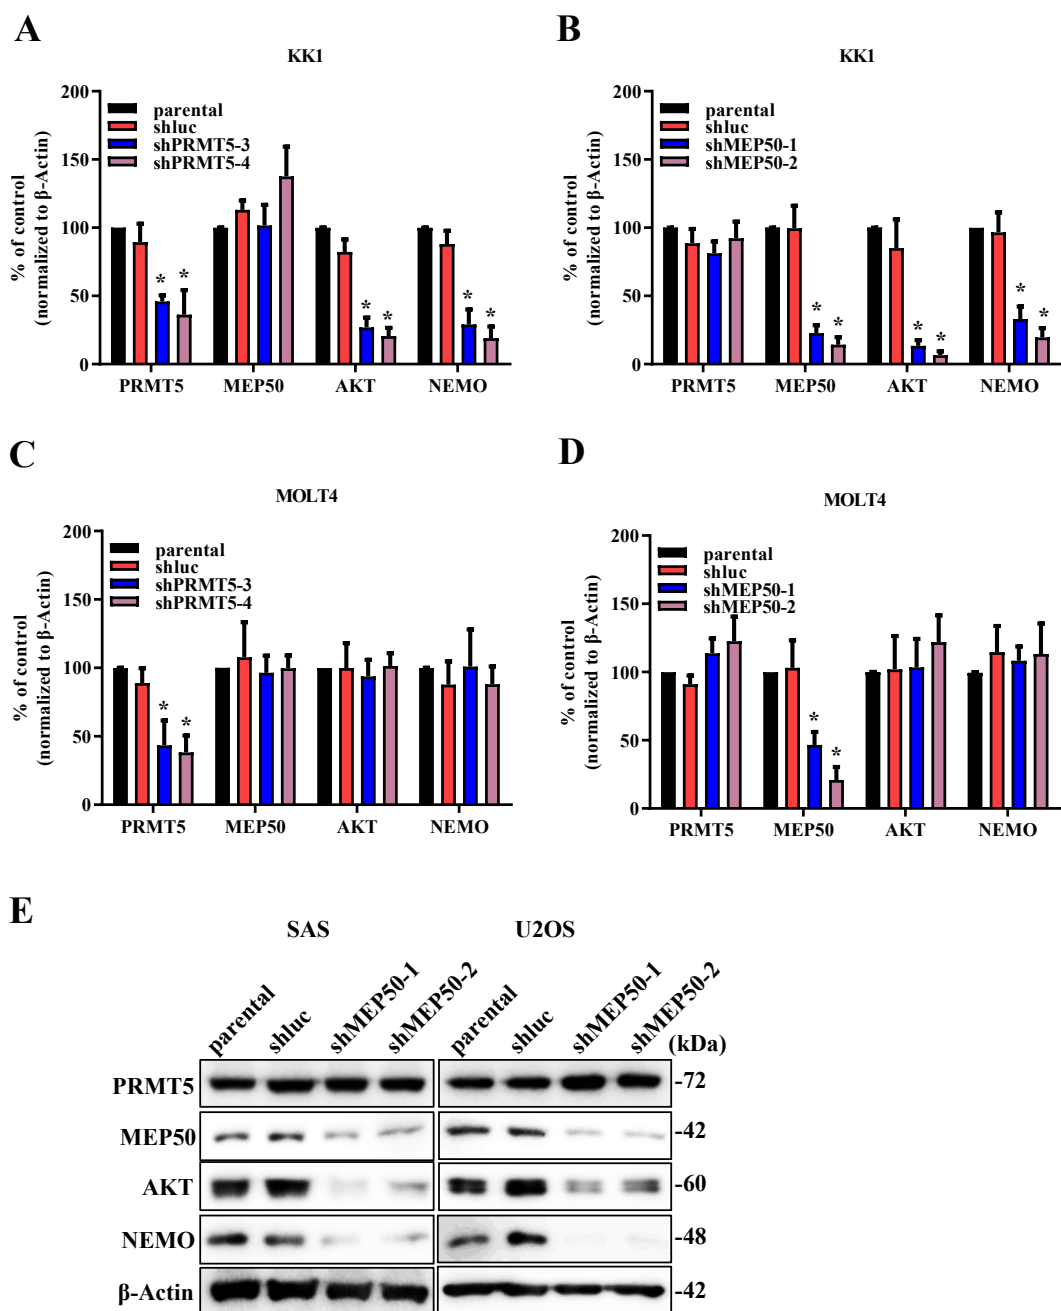

**Supplementary Figure S1. The knockdown of PRMT5/MEP50 expression results in the inhibition of cell proliferation through the degradation of client proteins in ATL and various cancer cells with low NDRG2 expression.**

(A) Expression of PRMT5, MEP50, AKT, and NEMO in KK1 cells (parental, shluc, shPRMT5-3, and 4) was immunoblotted by each specific antibody. Bar graphs show the quantification of the relative band intensity normalised to  $\beta$ -actin. The mean and s.d. are shown (n=3), with \*  $p<0.05$ , compared with parental.

(B) Expression of PRMT5, MEP50, AKT, and NEMO in KK1 cells (parental, shluc, shMEP50-1, and 2) was immunoblotted by each specific antibody. Bar graphs show the quantification of the relative band intensity normalised to  $\beta$ -actin. The mean and s.d. are shown (n=3), with \*  $p<0.05$ , compared with parental.

(C) Expression of PRMT5, MEP50, AKT, and NEMO in MOLT4 cells (parental, shluc, shPRMT5-3, and 4) was immunoblotted by each specific antibody. Bar graphs show the quantification of the relative band intensity normalised to  $\beta$ -actin. The mean and s.d. are shown (n=3), with \*  $p<0.05$ , compared with parental.

(D) Expression of PRMT5, MEP50, AKT, and NEMO in MOLT4 cells (parental, shluc, shMEP50-1, and 2) were immunoblotted by each specific antibody. Bar graphs show the quantification of the relative band intensity normalised to  $\beta$ -actin. The mean and s.d. are shown (n=3), with \*  $p<0.05$ , compared with parental.

(E) Expression of PRMT5, MEP50, AKT, and NEMO in SAS and U2OS cells (parental, shluc, shMEP50-1, and 2) was immunoblotted by each specific antibody.

**A**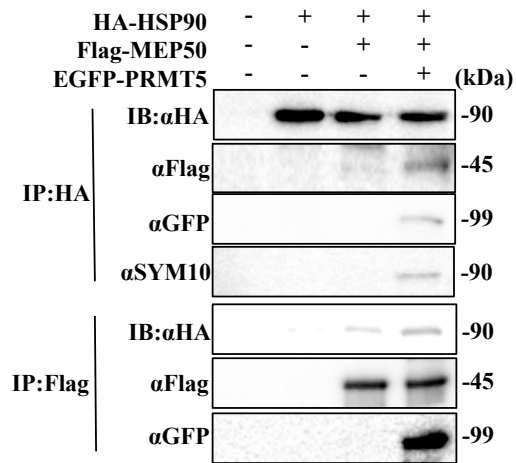**B**

293T

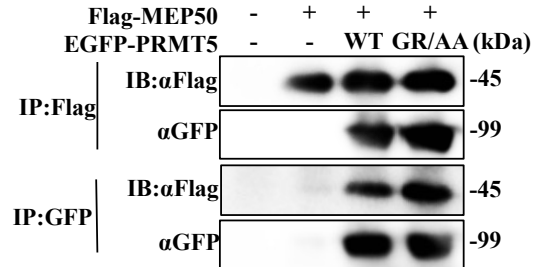

**Supplementary Figure S2. Hyperphosphorylated PRMT5 binds to MEP50 and promotes HSP90 arginine methylation.**

(A) The lysates of 293T cells transfected with HA-tagged HSP90, Flag-tagged MEP50, and/or EGFP-tagged PRMT5 were immunoprecipitated with anti-HA or anti-Flag antibody, and immunoprecipitates were assayed by western blotting with the indicated antibodies.

(B) EGFP-tagged wild-type or mutated PRMT5 (GR/AA) was co-transfected with Flag-tagged MEP50. The cell lysates were immunoprecipitated with anti-Flag antibody for MEP50 or anti-GFP antibody for PRMT5 and then immunoblotted by each indicated antibody.

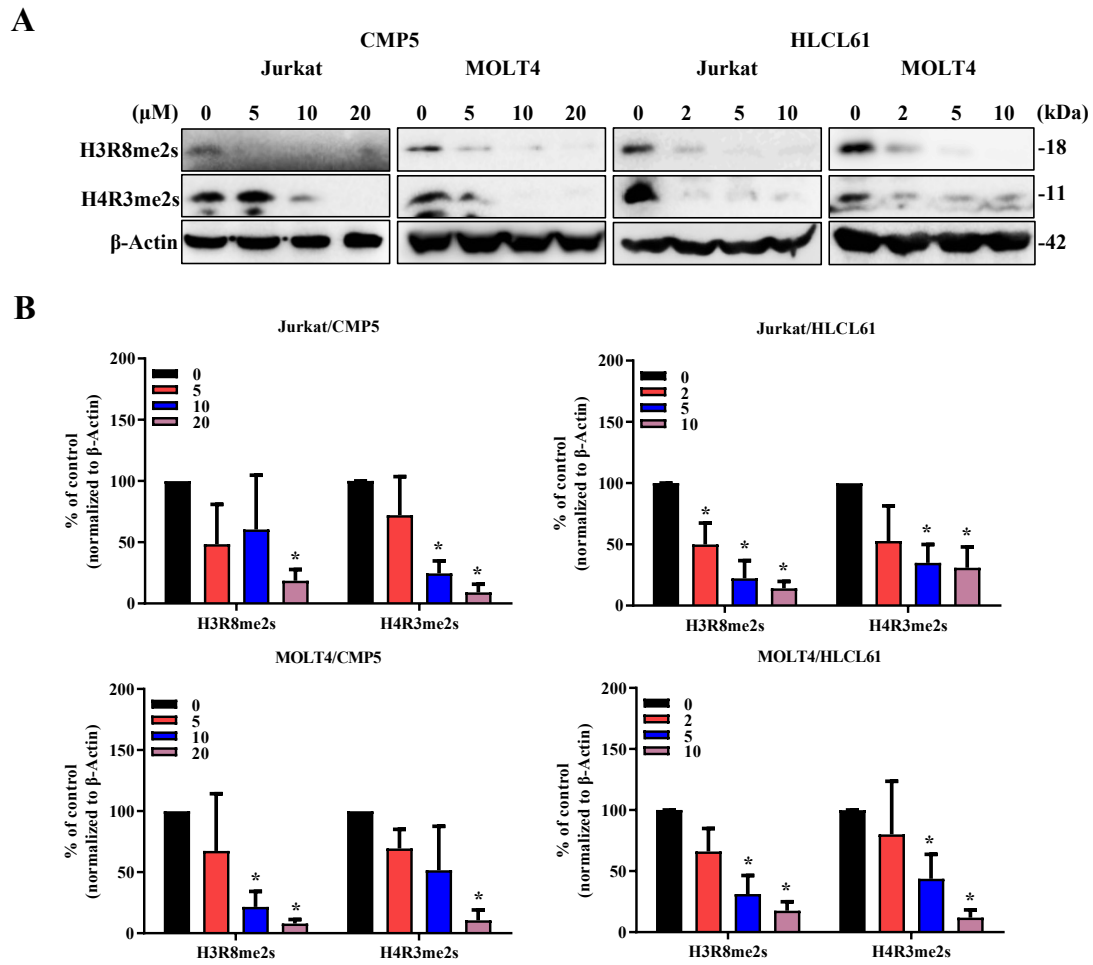

**Supplementary Figure S3. NDRG2<sup>low</sup> ATL cells are sensitive to PRMT5 inhibitors.**

(A) Expression of H3R8me2s and H4R3me2s in Jurkat and MOLT4 cells after treatment with the indicated doses of CMP5 and HLCL61 for 24 h were determined via immunoblot analysis.

(B) Bar graphs show the quantification of the relative band intensity normalised to  $\beta$ -actin. The mean and s.d. are shown (n=3), with \* p<0.05, compared with 0.

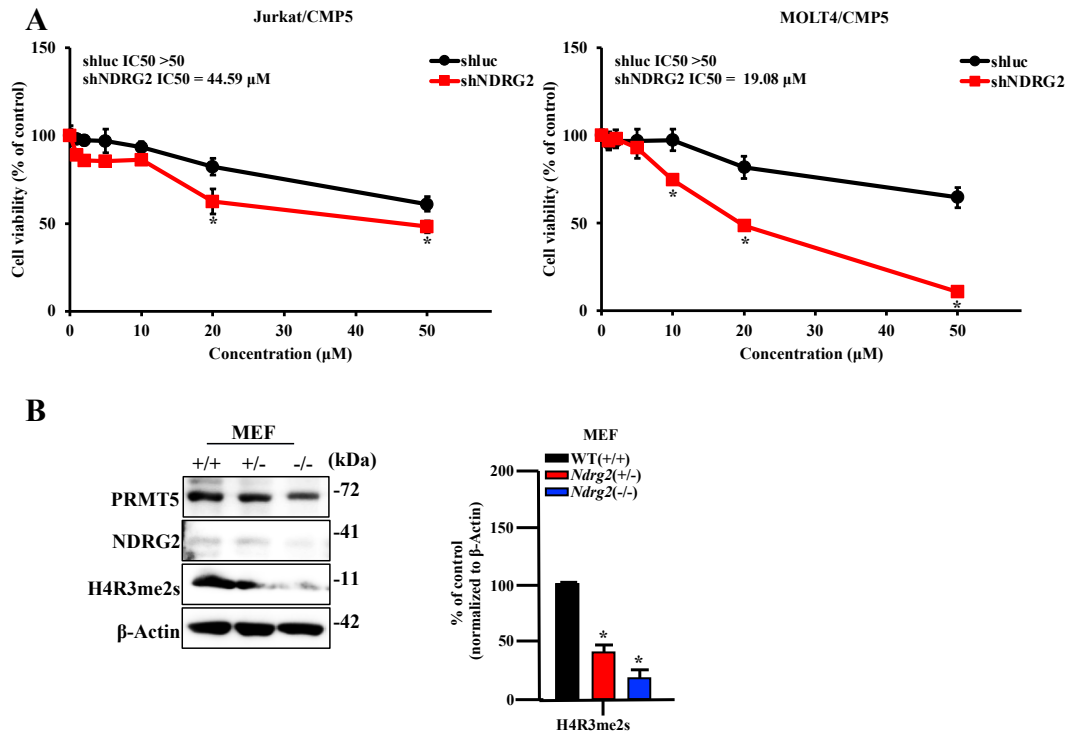

**Supplementary Figure S4. Knockdown of NDRG2 expression in T-ALL cells enhances sensitivity to PRMT5 inhibitors.**

(A) Cell viability and IC<sub>50</sub> were determined after treatment with 0-50 μM CMP5 at 120 h in Jurkat and MOLT4 cells (shluc and shNDRG2). The mean and s.d. are shown (n=4), with \*: p<0.05 compared with shluc.

(B) Expression of PRMT5, NDRG2, and H4R3me2s in WT(+/+), *Ndr2*(+/-), and *Ndr2*(-/-) MEFs was immunoblotted by each specific antibody. Bar graphs show the quantification of the relative band intensity normalised to β-actin. The mean and s.d. are shown (n=3), with \* p<0.05, compared with WT(+/+).

**A**

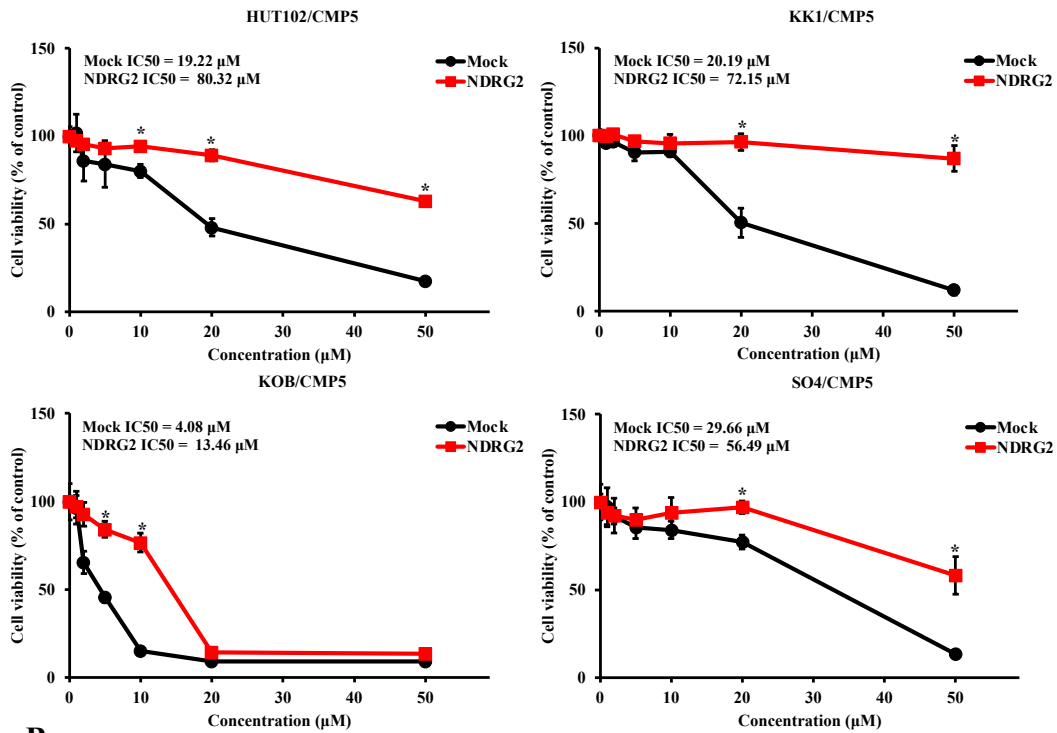

**B**

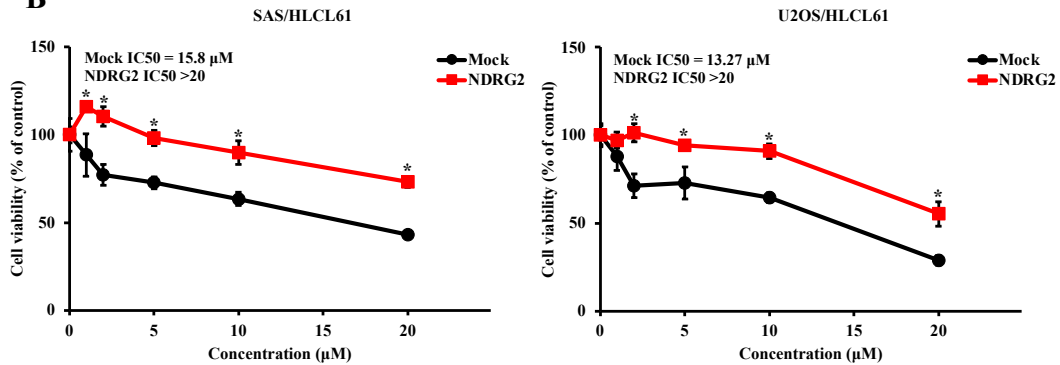

**C**

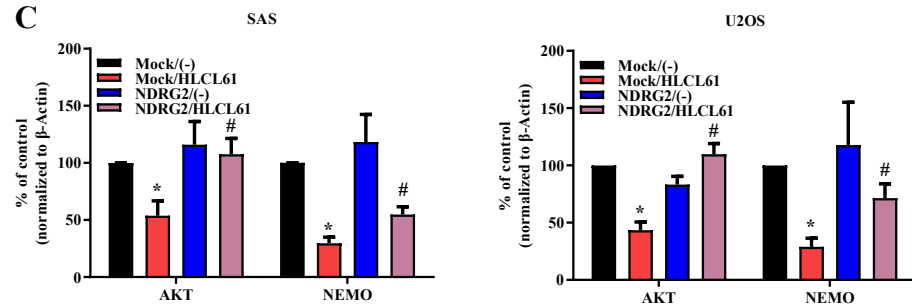

**Supplementary Figure S5. The enhanced expression of NDRG2 attenuates the antitumour effects of PRMT5 inhibitors in ATL and solid cancer cells.**

(A) Cell viability and IC<sub>50</sub> were determined after treatment with 0-50  $\mu$ M CMP5 at 120 h in HUT102, KOB, KK1, and SO4 cells (Mock and NDRG2). The mean and s.d. are shown (n=4), with \*: p<0.05 compared with Mock.

(D) Cell viability and IC<sub>50</sub> were determined after treatment with 0-20  $\mu$ M HLCL61 at 120 h in SAS and U2OS cells (Mock and NDRG2). The mean and s.d. are shown (n=4), with \*: p<0.05 compared with Mock/(-) and # p<0.05 compared with Mock/HLCL61.

(E) Expression of AKT and NEMO in SAS and U2OS cells (Mock and NDRG2) after treatment with 10  $\mu$ M HLCL61 for 24 h was determined via immunoblot analysis. Bar graphs show the quantification of the relative band intensity normalised to  $\beta$ -actin. The mean and s.d. are shown (n=3), with \* p<0.05, compared with parental.
